# Supplementary material for: Psychological Interventions for Psychosis: A Meta-Analysis of Comparative Outcome Studies
Source: Atypon-hosted journal article supplement (doi:10.1176/appi.ajp.2013.13081159), 2014-02-14
Supplement: 523_ds001.pdf [file 523_ds001.pdf]

Search strings used in systematic search

### **PubMed**

Schizophrenia and Disorders with Psychotic Features AND (psychotherapy OR psychological intervention OR behaviour therapy OR cognitive therapy OR family therapy OR cognitive remediation OR social skills training OR sensory art therapies OR art therapy OR psychoeducation OR psychoanalytic therapy OR counseling OR supportive therapy)

Following this search, the relevant option was selected to limit the search to Randomised Controlled Trials

### **Psychinfo**

Schizophrenia OR psychosis AND (psychotherapy OR psychological intervention OR behaviour therapy OR cognitive therapy OR cognitive behaviour therapy OR family therapy OR family intervention OR cognitive remediation OR social skills training OR creative arts therapy OR psychoeducation OR psychodynamic psychotherapy OR counseling OR supportive therapy)

Following this search, the relevant option was selected to limit the search to outcome/clinical trials

### **Embase**

'Schizophrenia and Disorders with Psychotic Features' AND (psychotherapy OR psychological intervention OR behaviour therapy OR cognitive therapy OR family therapy OR cognitive remediation OR social adaptation OR art therapy OR psychoeducation OR psychoanalysis OR counseling OR supportive therapy)

Following this search, the relevant option was selected to limit the search to Randomised Controlled Trials

### **Cochrane Central Register of Controlled Trials:**

(Schizophreni\* or Psychotic) and (psychotherapy OR psychological intervention OR behaviour therapy OR cognitive therapy OR family therapy OR cognitive remediation OR social skills training OR sensory art therapies OR art therapy OR psychoeducation OR psychoanalytic therapy OR counseling OR supportive therapy)

## **Researcher Allegiance Assessment Tool.**

Researcher Allegiance is a risk when:

- 1) Only one of the interventions was mentioned in the title
  
- 2) One of the two interventions was explicitly mentioned as the main experimental intervention in the introduction section of the study
  
- 3) One intervention was explicitly described as a control condition included to control for the non-specific components of the other therapy
  
- 4) There was an explicit hypothesis that one comparison therapy was expected to be more effective than the other

The scale is dichotomous and if any of the four items are present, the study being assessed is considered as showing researcher allegiance. If none of the four items are present, the study is considered as showing no researcher allegiance.
